# Supplementary material for: Incorporation of Graphene Nanoplatelets into Fiber-Reinforced Polymer Composites in the Presence of Highly Branched Waterborne Polyurethanes
Source: MDPI journal article supplement (doi:10.3390/polym16060828), 2024-03-16
Supplement: s1 [file s1]

# Supporting Information

## **Incorporation of Graphene Nanoplatelets into Fiber-Reinforced Polymeric Composites in the Presence of Highly Branched Waterborne Polyurethanes**

Ayşe Durmuş-Sayar<sup>1,2</sup>, Murat Tansan<sup>1</sup>, Tuğçe Çinko-Çoban<sup>1</sup>, Dilay Serttan<sup>1</sup>, Bekir  
Dizman<sup>1,2</sup>, Mehmet Yildiz<sup>1,2</sup>, Serkan Ünal <sup>1,2,\*</sup>

<sup>1</sup> Sabanci University Integrated Manufacturing Technologies Research and Application  
Center & Composite Technologies Centre of Excellence, Teknopark Istanbul, 34906,  
Pendik, Istanbul, Turkey

<sup>2</sup> Faculty of Engineering and Natural Sciences, Sabanci University, Tuzla, 34956,  
Istanbul, Turkey

Corresponding author: Email address: serkan.unal@sabanciuniv.edu

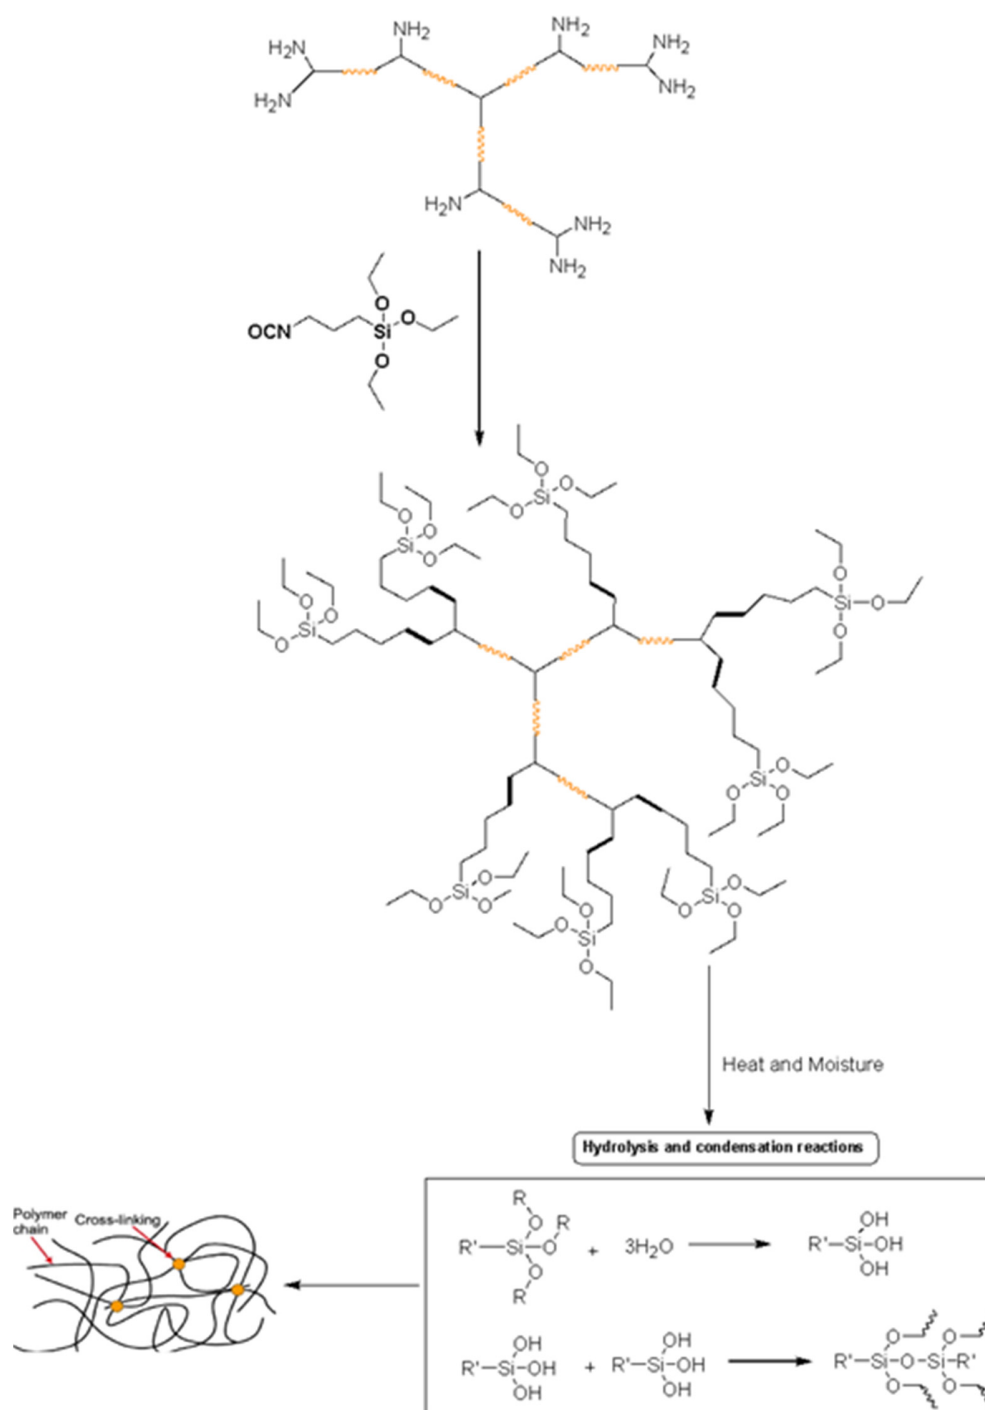

**Figure S1.** Self-crosslinking mechanism of HBPU-50 upon film formation.

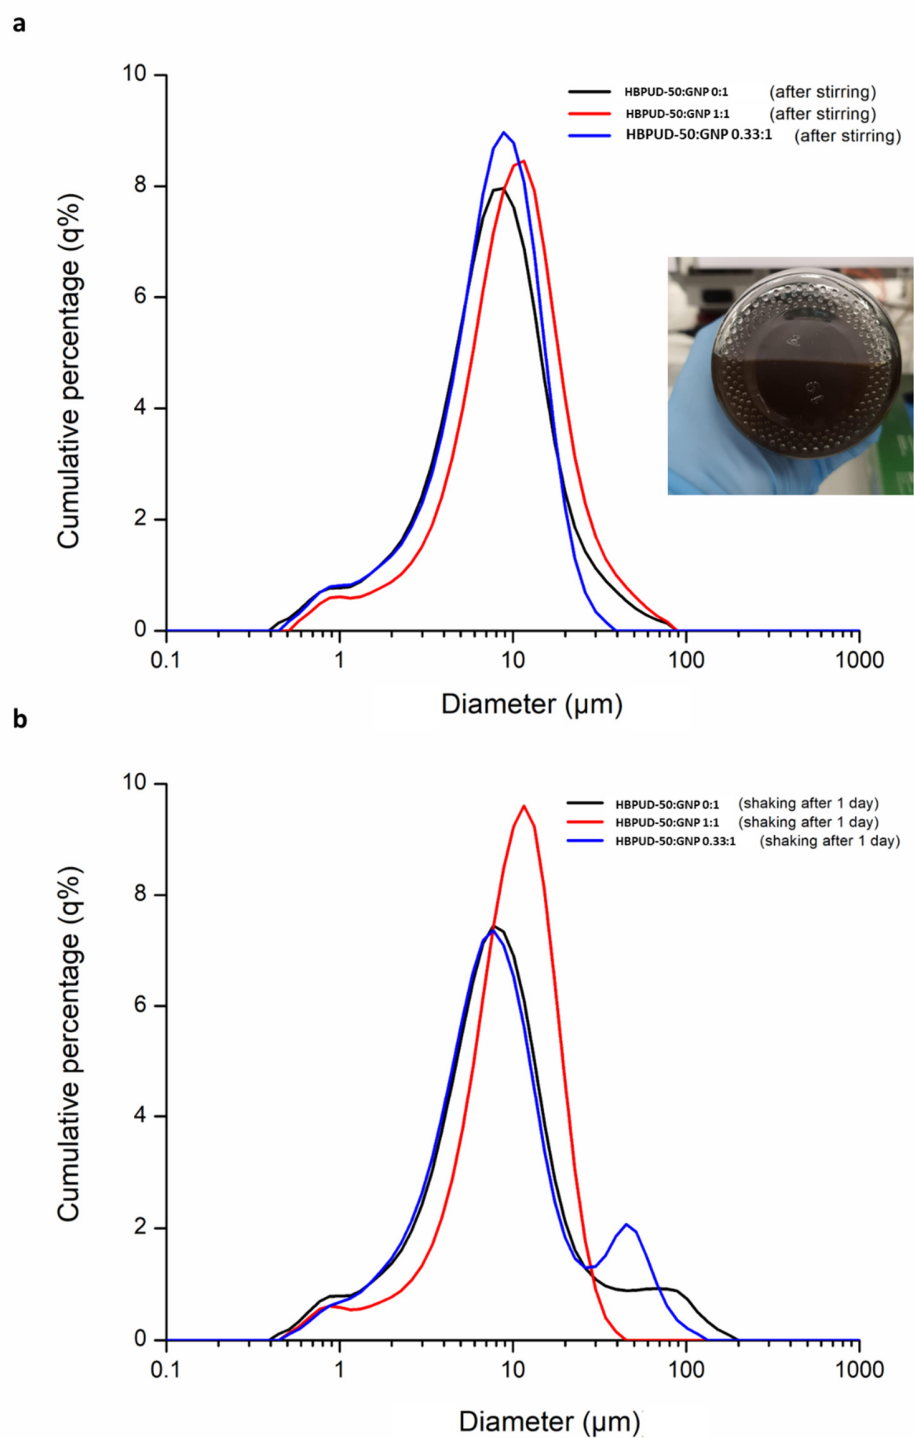

**Figure S2.** Particle size analyses of HBPUD-50/GNP dispersion mixtures are a) freshly prepared, and b) gently shaken after one day of storage (All measurements were performed at 0.05wt.% concentration).

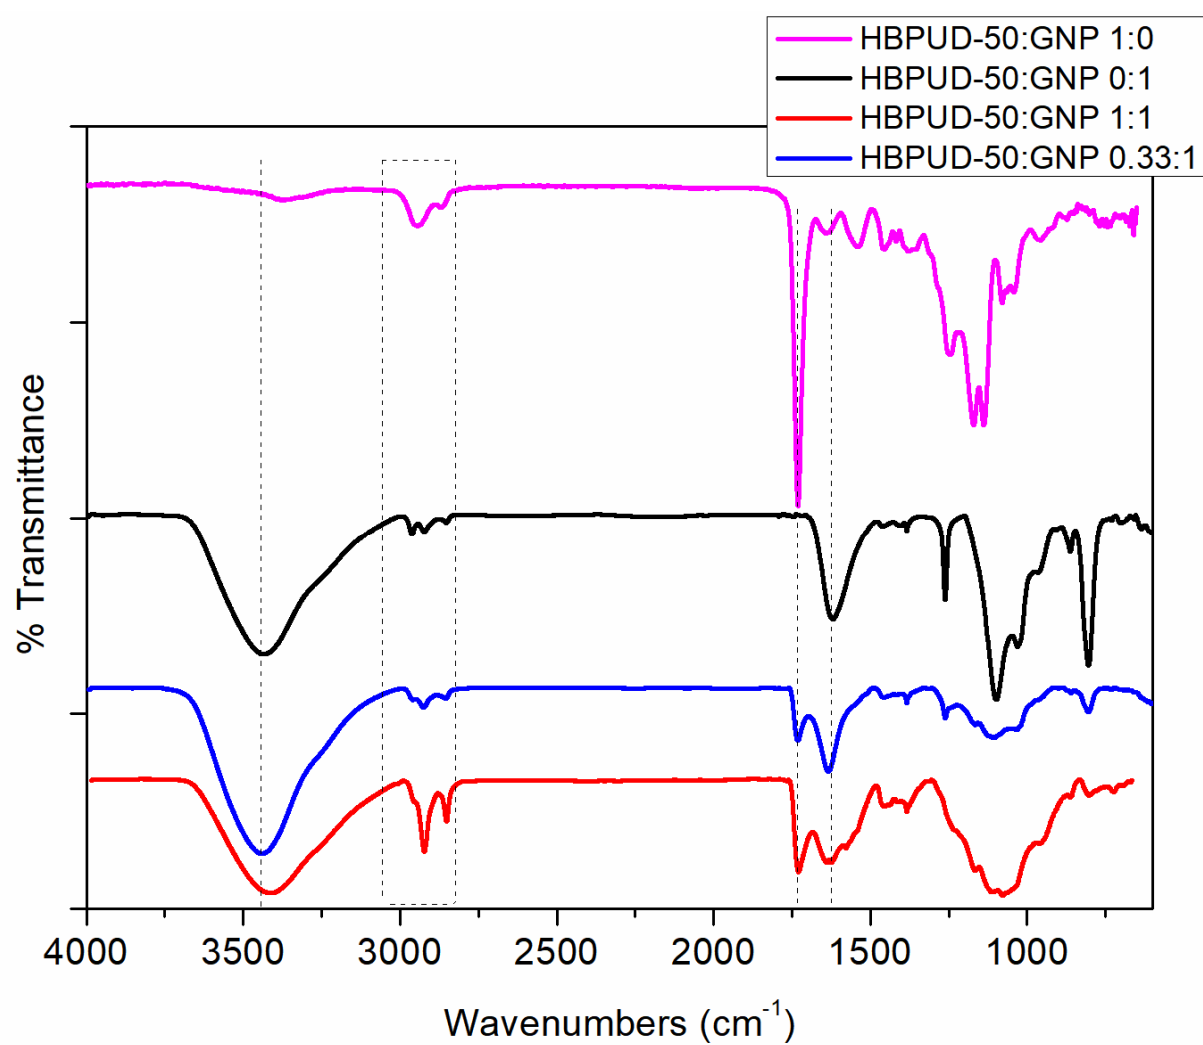

**Figure S3.** FT-IR spectra of dried HBPUD-50/GNP samples
